# Supplementary material
Source: PubMed Central journal article supplement (PMC5610907)

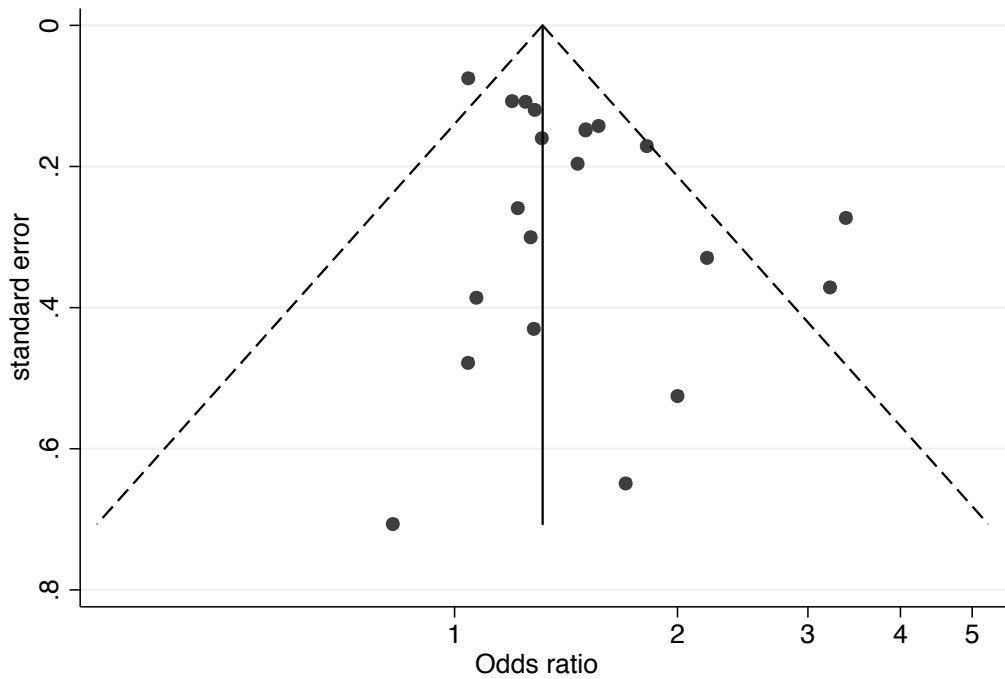

Supplement: NIHMS904559-supplement-Figure_1.pdf [file NIHMS904559-supplement-Figure_1.pdf]

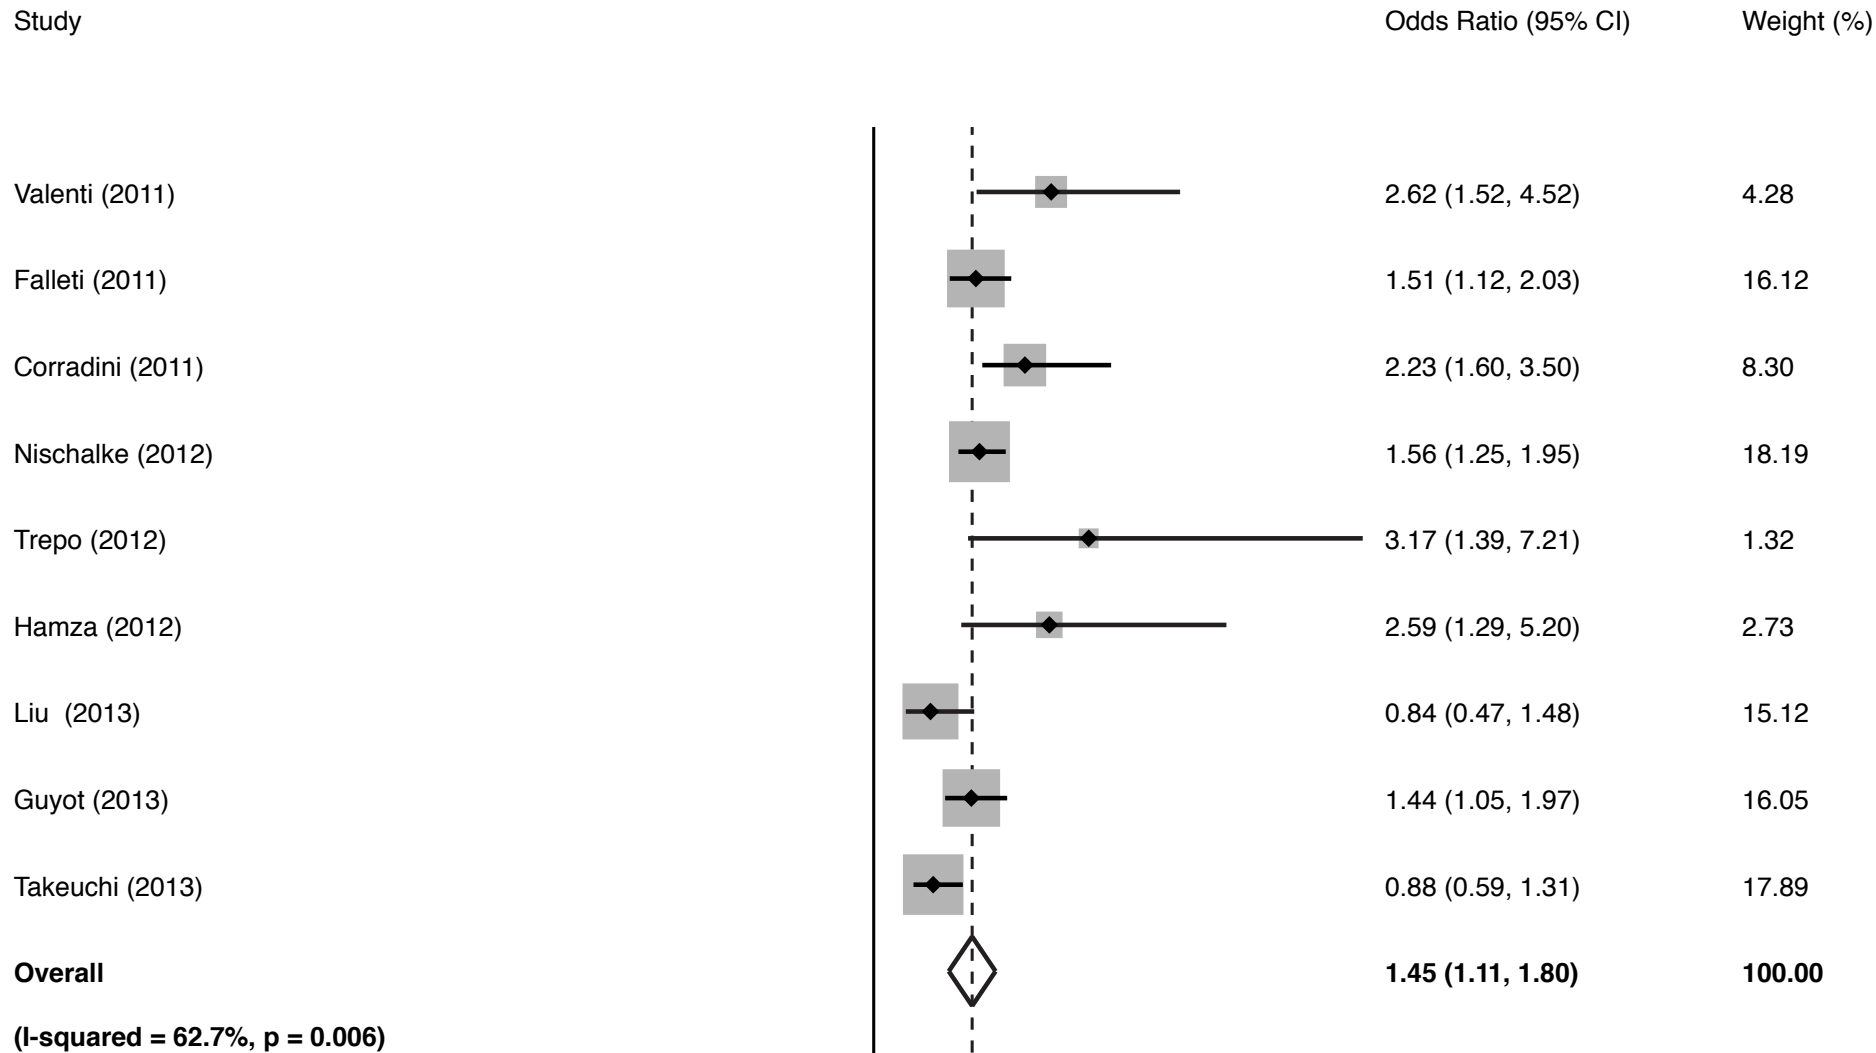

-7.21

0

7.21

Supplement: NIHMS904559-supplement-Figure_2.pdf [file NIHMS904559-supplement-Figure_2.pdf]
